# Supplementary material for: Centers for Disease Control and Prevention Investments in Adverse Childhood Experience Prevention Efforts
Source: PubMed Central journal article supplement — Am J Prev Med. Author manuscript; Available in PMC 2024 Jul 2. (PMC11219185; doi:10.1016/j.amepre.2021.11.014), 2022-06
Supplement: NIHMS2001234-supplement-Figure_1_and_Table_1.pdf [file NIHMS2001234-supplement-Figure_1_and_Table_1.pdf]

**Appendix**  
**Centers for Disease Control and Prevention Investments**  
**In Adverse Childhood Experience Prevention Efforts**  
**Gervin et al.**

**Appendix Table 1.** Strategies and Approaches Based on the Best Available Evidence That Can Prevent and Mitigate the Harms of Adverse Childhood Experiences (ACEs)

| <b>Strategy</b>                                                  | <b>Approach</b>                                                                                                                                                                                                                                                                                                     |
|------------------------------------------------------------------|---------------------------------------------------------------------------------------------------------------------------------------------------------------------------------------------------------------------------------------------------------------------------------------------------------------------|
| Strengthen economic supports to families                         | <ul style="list-style-type: none"> <li>• Strengthening household financial security</li> <li>• Family-friendly work policies</li> </ul>                                                                                                                                                                             |
| Promote social norms that protect against violence and adversity | <ul style="list-style-type: none"> <li>• Public education campaigns</li> <li>• Legislative approaches to reduce corporal punishment</li> <li>• Bystander approaches</li> <li>• Men and boys as allies in prevention</li> </ul>                                                                                      |
| Ensure a strong start for children                               | <ul style="list-style-type: none"> <li>• Early childhood home visitation</li> <li>• High-quality child care</li> <li>• Preschool enrichment with family engagement</li> </ul>                                                                                                                                       |
| Teach skills                                                     | <ul style="list-style-type: none"> <li>• Social-emotional learning</li> <li>• Safe dating and healthy relationship skill programs</li> <li>• Parenting skills and family relationship approaches</li> </ul>                                                                                                         |
| Connect youth to caring adults and activities                    | <ul style="list-style-type: none"> <li>• Mentoring programs</li> <li>• After-school programs</li> </ul>                                                                                                                                                                                                             |
| Intervene to lessen immediate and long-term harms                | <ul style="list-style-type: none"> <li>• Enhanced primary care</li> <li>• Victim-centered services</li> <li>• Treatment to lessen the harms of ACEs</li> <li>• Treatment to prevent problem behavior and future involvement in violence</li> <li>• Family-centered treatment for substance use disorders</li> </ul> |

*Source:* CDC. (2019). Preventing Adverse Childhood Experiences: Leveraging the Best Available Evidence. Centers for Disease Control and Prevention: National Center for Injury Prevention and Control, Atlanta, GA.  
<https://www.cdc.gov/violenceprevention/pdf/preventingACES.pdf>.

**Appendix**  
**Centers for Disease Control and Prevention Investments**  
**In Adverse Childhood Experience Prevention Efforts**  
**Gervin et al.**

**Appendix Figure 1.** Select CDC investments in surveillance, research, and programmatic efforts to prevent adverse childhood experiences.

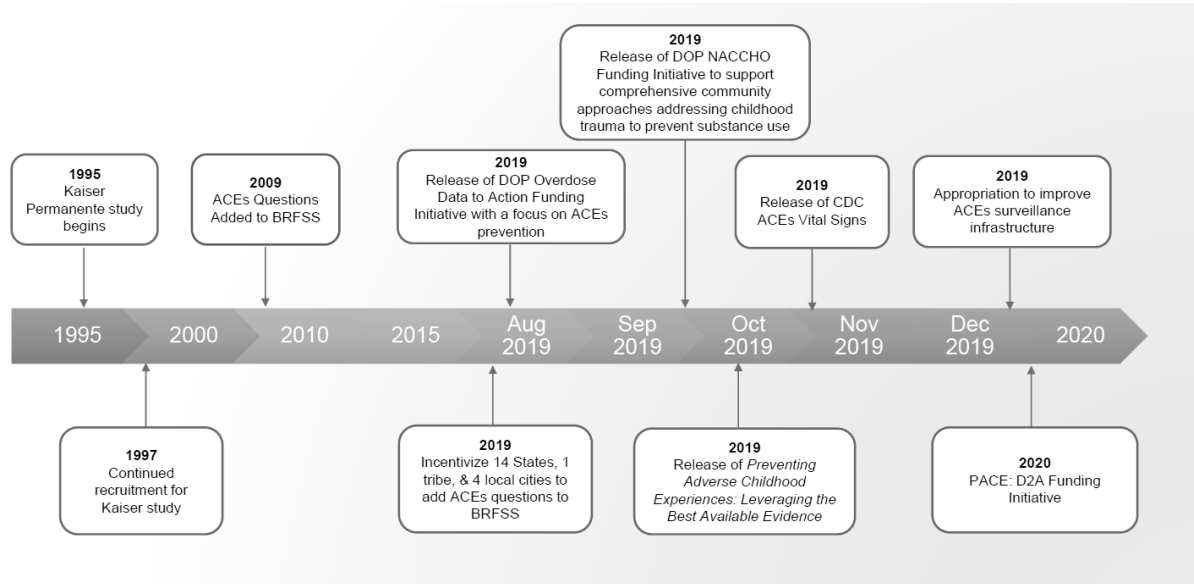

ACEs, adverse childhood experiences; BRFSS, Behavioral Risk Factor Surveillance System; DOP, Division of Overdose Prevention; NACCHO, National Association of County and City Health Officials; CDC, Centers for Disease Control and Prevention; PACE: D2A, Preventing Adverse Childhood Experiences: Data to Action.
